# Supplementary material for: Construction of five cuproptosis-related lncRNA signature for predicting prognosis and immune activity in skin cutaneous melanoma
Source: PubMed Central journal article supplement (PMC9490379; doi:10.3389/fgene.2022.972899), 2022-09-07
Supplement: Image1.pdf [file Image1.pdf]

Figure S1:

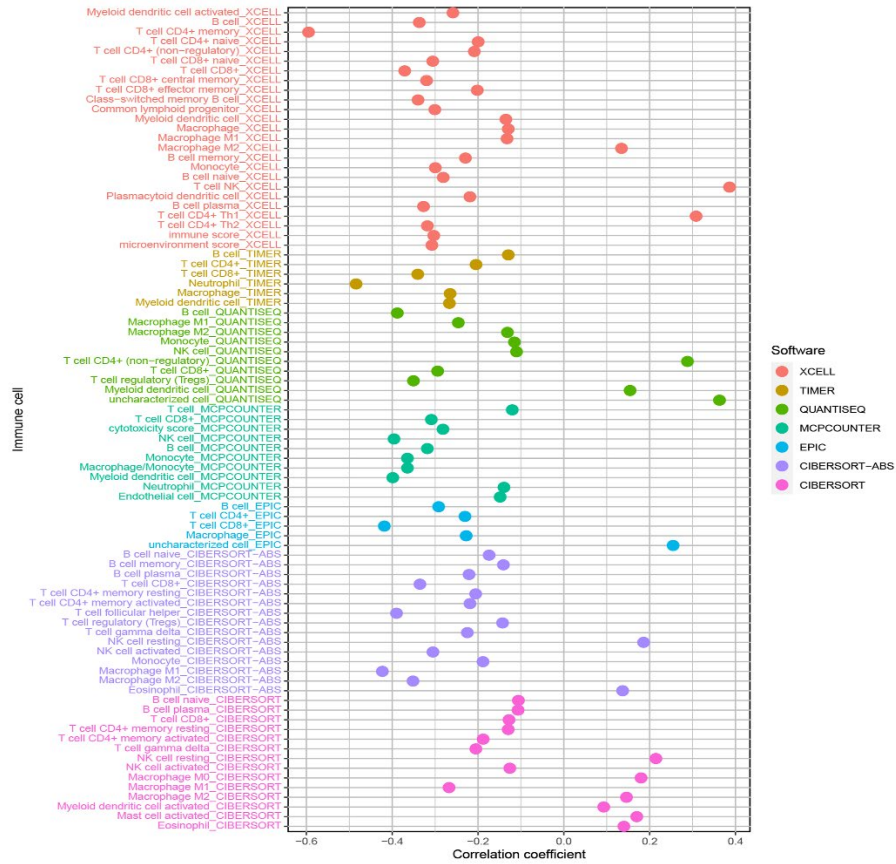

Figure S1| The relationship between the risk score and immune cells infiltration.
